# Supplementary material for: BIOFACQUIM: A Mexican Compound Database of Natural Products
Source: PubMed Central journal article supplement (PMC6358837; doi:10.3390/biom9010031), 2019-01-17
Supplement: biomolecules-09-00031-s001.pdf [file biomolecules-09-00031-s001.pdf]

## SUPPLEMENTARY MATERIAL

### BIOFACQUIM: A Mexican compound database of natural products

B. Angélica Pilón-Jiménez, Fernanda I. Saldívar-González, Bárbara I. Díaz-Eufracio, José L. Medina-Franco

#### Contents

|                  |                                                                                                                                                                                                                        | Page |
|------------------|------------------------------------------------------------------------------------------------------------------------------------------------------------------------------------------------------------------------|------|
| <b>Table S1</b>  | Loadings for the first three principal components of the property space of eight databases.                                                                                                                            | S2   |
| <b>Figure S1</b> | Distribution of the pairwise similarity values calculated for BIOFACQUIM and the reference data sets computed with MACCS keys (166-bits) and the Tanimoto coefficient.                                                 | S3   |
| <b>Table S2</b>  | Statistics of the cyclic system recovery curves for BIOFACQUIM and the reference data sets.                                                                                                                            | S4   |
| <b>Figure S2</b> | Visual representation of the chemical space of BIOFACQUIM compared with: <b>a)</b> Fungi, <b>b)</b> NATx, <b>c)</b> Cyanobacterias, <b>d)</b> MEGx, <b>e)</b> NuBBEDB, <b>f)</b> Marines; Figure generated with t-SNE. | S5   |
| <b>Figure S3</b> | Violin plots for the physicochemical properties of BIOFACQUIM and reference data sets.                                                                                                                                 | S6   |

**Table S1.** Loadings for the first three principal components of the property space of eight databases

| <b>Principal Component</b> | <b>PC1</b> | <b>PC2</b> | <b>PC3</b> |
|----------------------------|------------|------------|------------|
| Eigenvalue                 | 1.98       | 1.05       | 0.71       |
| Cumulative eigenvalue (%)  | 65.58      | 83.85      | 92.15      |
| SlogP                      | 0.18       | -0.86      | 0.23       |
| TPSA                       | -0.49      | 0.04       | 0.21       |
| MW                         | -0.45      | -0.31      | 0.13       |
| HBA                        | -0.45      | -0.04      | 0.47       |
| HBD                        | -0.44      | 0.23       | -0.08      |
| RB                         | -0.37      | -0.33      | -0.81      |

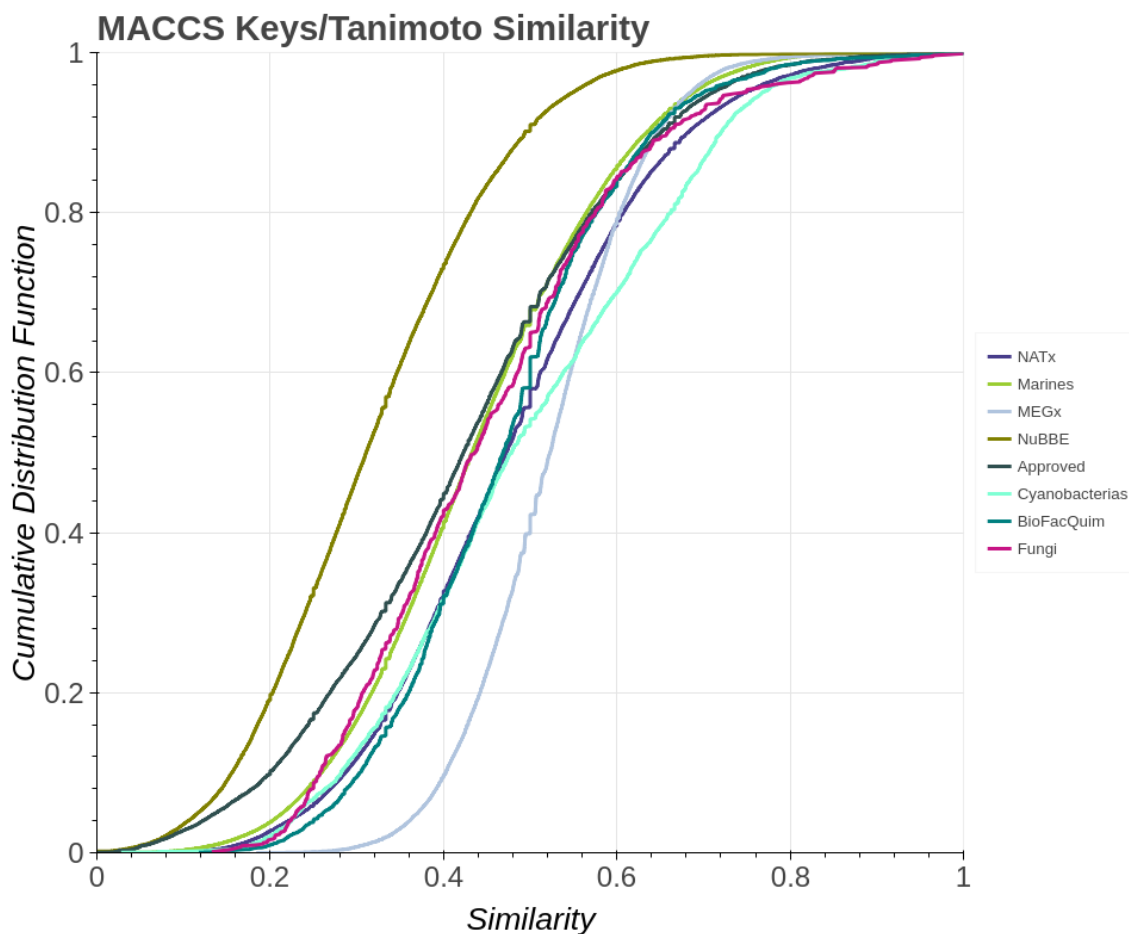

|               | NATx | Marines | MEGx | NuBBE | Approved | Cyanobacterias | BIOFACQUIM | Fungi |
|---------------|------|---------|------|-------|----------|----------------|------------|-------|
| <b>MIN</b>    | 0.06 | 0.0     | 0.18 | 0.0   | 0.0      | 0.03           | 0.12       | 0.13  |
| <b>1Q</b>     | 0.0  | 0.0     | 0.0  | 0.0   | 0.0      | 0.0            | 0.0        | 0.0   |
| <b>MEDIAN</b> | 0.0  | 0.0     | 1.0  | 0.0   | 0.0      | 0.0            | 0.0        | 0.0   |
| <b>MEAN</b>   | 0.48 | 0.44    | 0.52 | 0.32  | 0.42     | 0.5            | 0.47       | 0.45  |
| <b>3Q</b>     | 0.58 | 0.54    | 0.59 | 0.41  | 0.54     | 0.63           | 0.55       | 0.55  |
| <b>MAX</b>    | 1.0  | 1.0     | 1    | 1.0   | 1.0      | 1.0            | 1.0        | 1.0   |
| <b>STD</b>    | 0.15 | 0.14    | 0.1  | 0.13  | 0.17     | 0.17           | 0.13       | 0.16  |

**Figure S1.** Distribution of the pairwise similarity values calculated for BIOFACQUIM and the reference data sets computed with MACCS keys (166-bits) and the Tanimoto coefficient.

**Table S2.** Statistics of the cyclic system recovery curves for BIOFACQUIM and the reference data sets

| DB             | PCP      | FP      | Scaffold | Relative size |
|----------------|----------|---------|----------|---------------|
|                | EDmedian | Tmedian | AUC      |               |
| Approved       | 1.96     | 0.32    | 0.59     | 699           |
| BIOFACQUIM     | 1.74     | 0.45    | 0.72     | 423           |
| Cyanobacterias | 2.64     | 0.50    | 0.74     | 473           |
| Fungi          | 1.39     | 0.44    | 0.66     | 206           |
| MEGx           | 2.28     | 0.43    | 0.60     | 1000          |
| Marines        | 1.93     | 0.40    | 0.58     | 1500          |
| NATx           | 3.04     | 0.51    | 0.55     | 2000          |
| NuBBE          | 2.51     | 0.39    | 0.67     | 1000          |

Databases (DB), physicochemical diversity (PCP), Euclidean distance (ED), fingerprint (FP), Tanimoto coefficient (T), area under the curve (AUC).

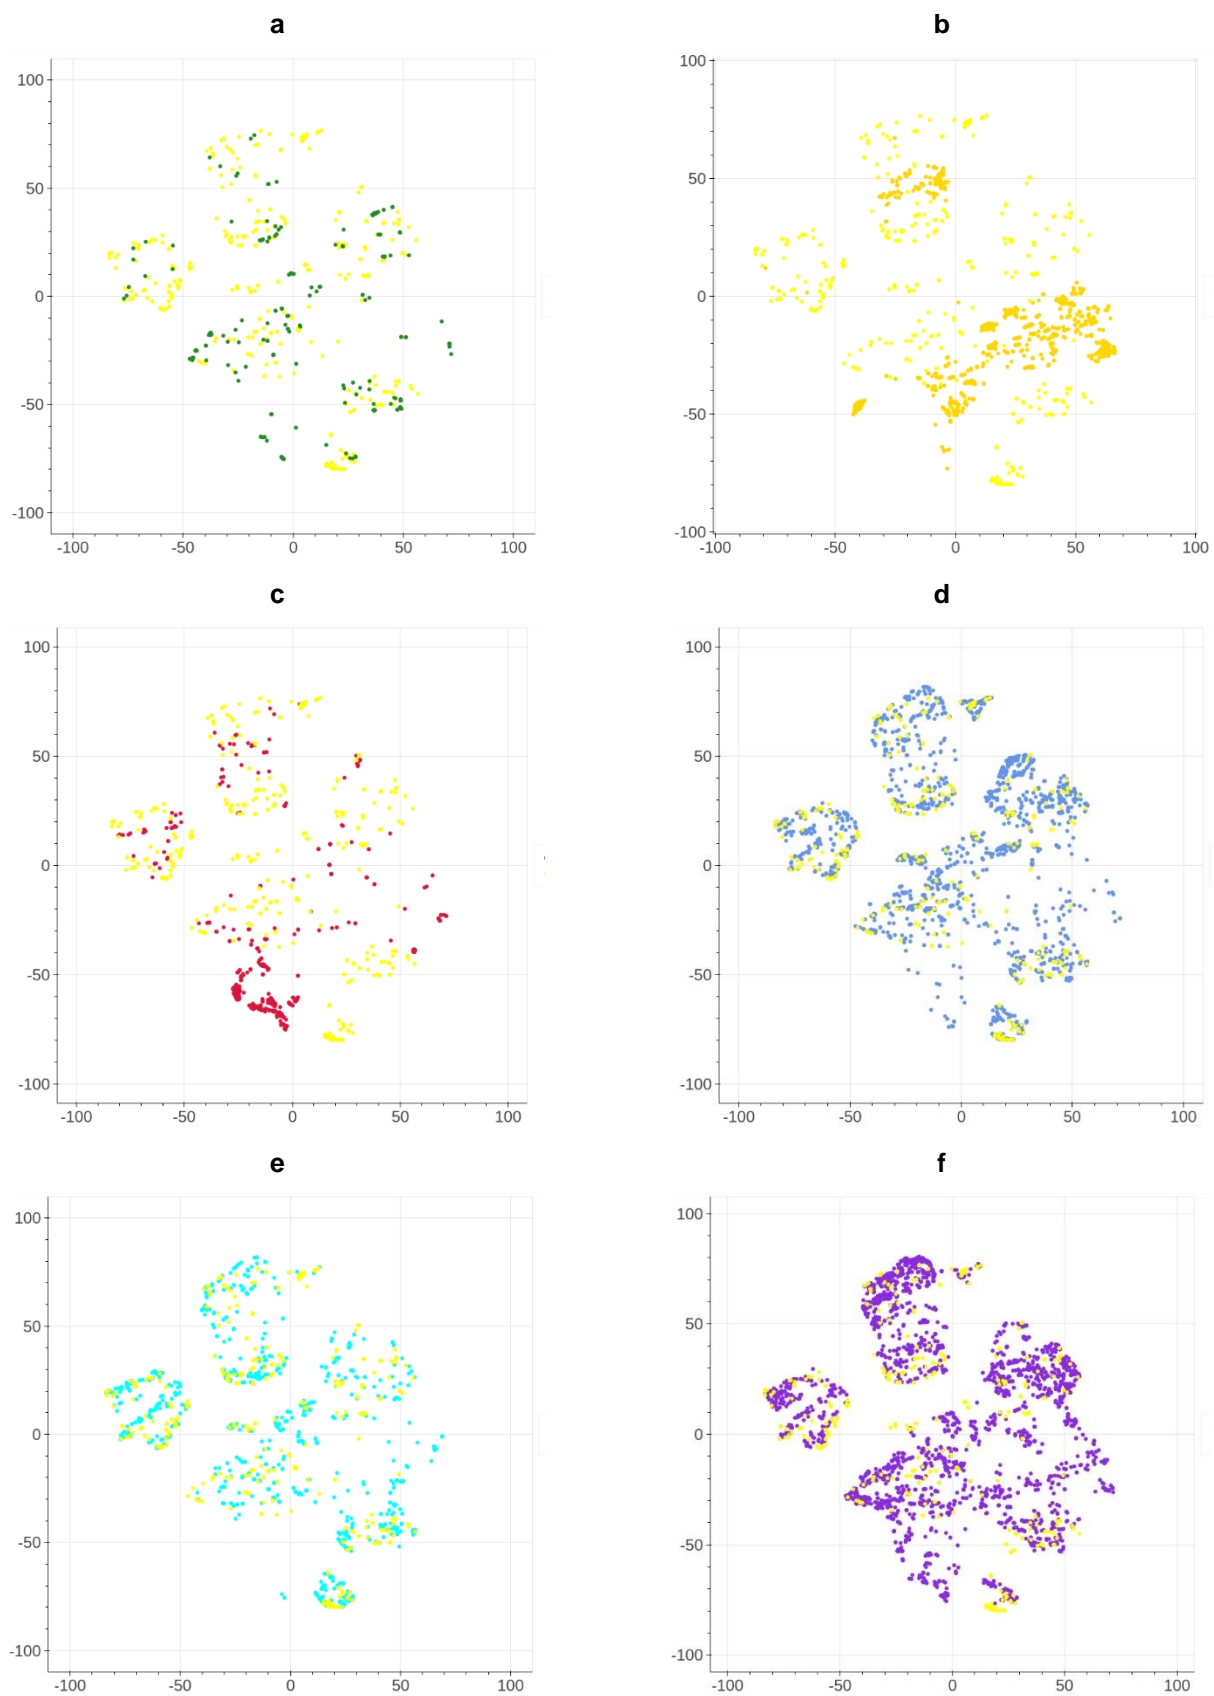

**Figure S2.** Visual representation of the chemical space of BIOFACQUIM compared with: **a)** Fungi, **b)** NATx, **c)** Cyanobacterias, **d)** MEGx, **e)** NuBBE<sub>DB</sub>, **f)** Marines. Figure generated with t-SNE.

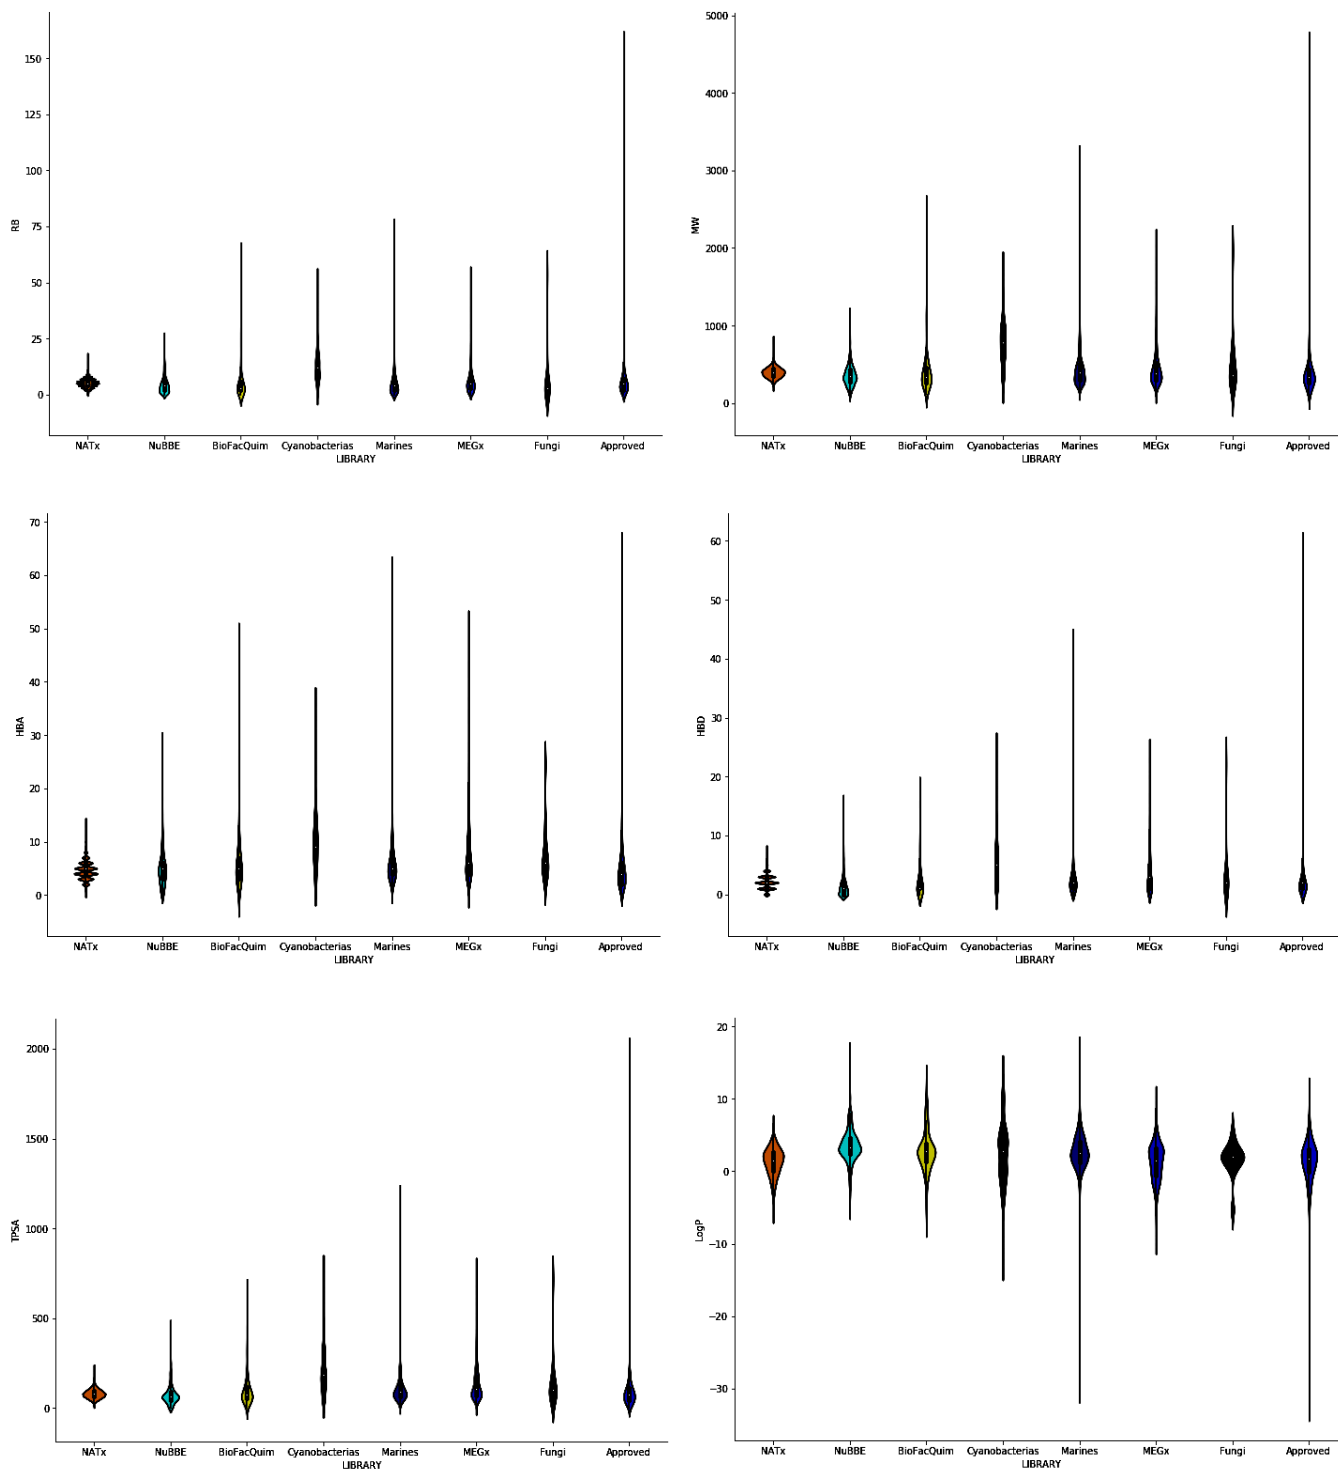

**Figure S3.** Violin plots for the physicochemical properties of BIOFACQUIM and reference data sets.
